# Supplementary material
Source: PubMed Central journal article supplement (PMC10316753)
Supplement: oe-31-10-16393-s001.pdf [file oe-31-10-16393-s001.pdf]

# Tolerance to aberration and misalignment in a two-point-resolving image inversion interferometer: supplement

DAVID J. SCHODT,<sup>1,2,\*</sup>  PATRICK J. CUTLER,<sup>2</sup> FRANCISCO E. BECERRA,<sup>1,3</sup> AND KEITH A. LIDKE<sup>1</sup>

<sup>1</sup>*Department of Physics and Astronomy, University of New Mexico, Albuquerque, New Mexico, USA*

<sup>2</sup>*Teledyne Scientific & Imaging, LLC, USA*

<sup>3</sup>*Center for Quantum Information and Control, University of New Mexico, Albuquerque, New Mexico, USA*

\**david.schodt@teledyne.com*

---

This supplement published with Optica Publishing Group on 1 May 2023 by The Authors under the terms of the [Creative Commons Attribution 4.0 License](https://creativecommons.org/licenses/by/4.0/) in the format provided by the authors and unedited. Further distribution of this work must maintain attribution to the author(s) and the published article's title, journal citation, and DOI.

Supplement DOI: <https://doi.org/10.6084/m9.figshare.22665886>

Parent Article DOI: <https://doi.org/10.1364/OE.487808>

# Tolerance to Aberration and Misalignment in a Two-Point-Resolving Image Inversion Interferometer: supplemental document

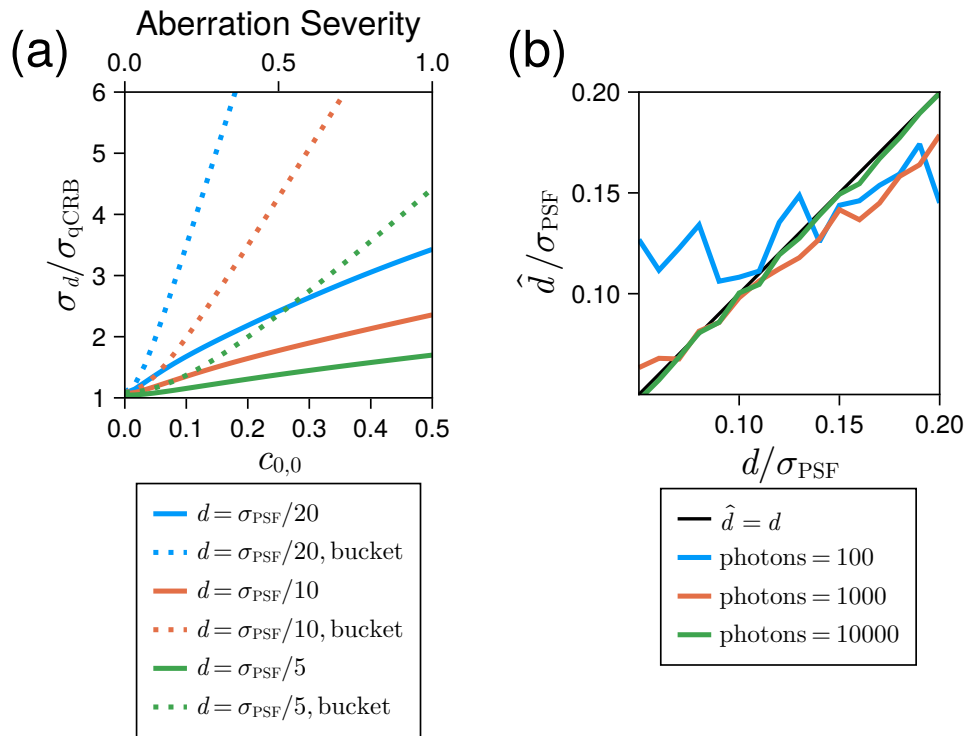

**Fig. S1. Intra-SLIVER phase piston.** (a)  $\sigma_d / \sigma_{q\text{CRB}}$  as a function of increasing piston ( $n=0, l=0$ ) in one arm of the interferometer for pixelated (solid lines) and bucket (dashed lines) SLIVER measurements. (b) MLE of the separation for a Zernike coefficient of 0.25 at varying signal levels when the model has complete knowledge of the aberration.

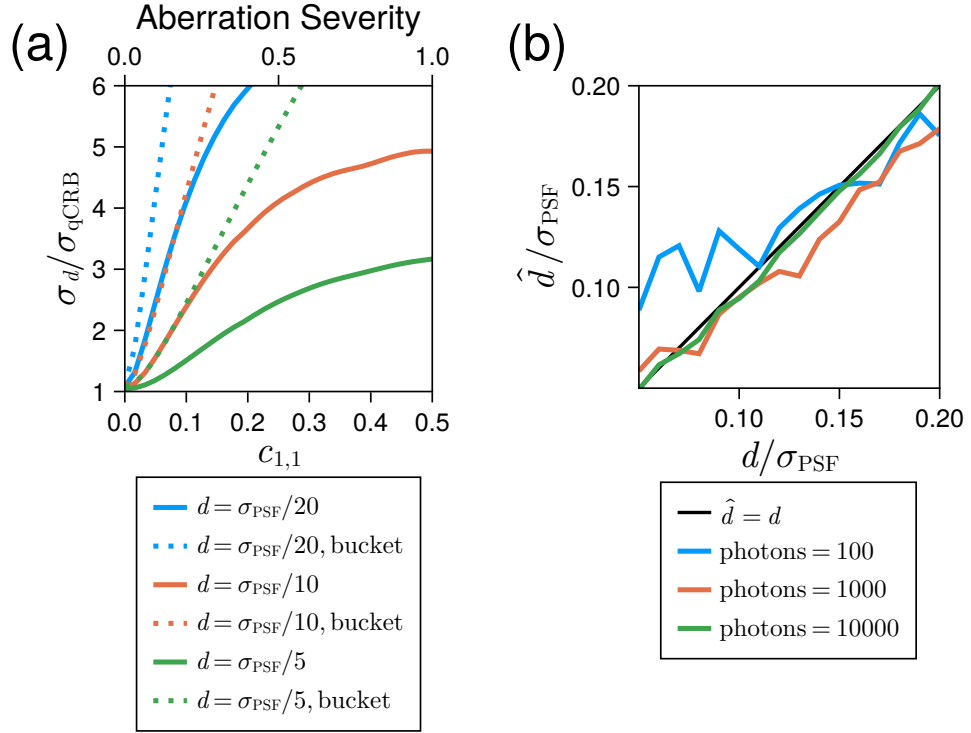

**Fig. S2. Intra-SLIVER phase tilt.** (a)  $\sigma_d / \sigma_{qCRB}$  as a function of increasing horizontal tilt ( $n=1$ ,  $l=1$ ) in one arm of the interferometer for pixelated (solid lines) and bucket (dashed lines) SLIVER measurements. (b) MLE of the separation for a Zernike coefficient of 0.25 at varying signal levels when the model has complete knowledge of the aberration.

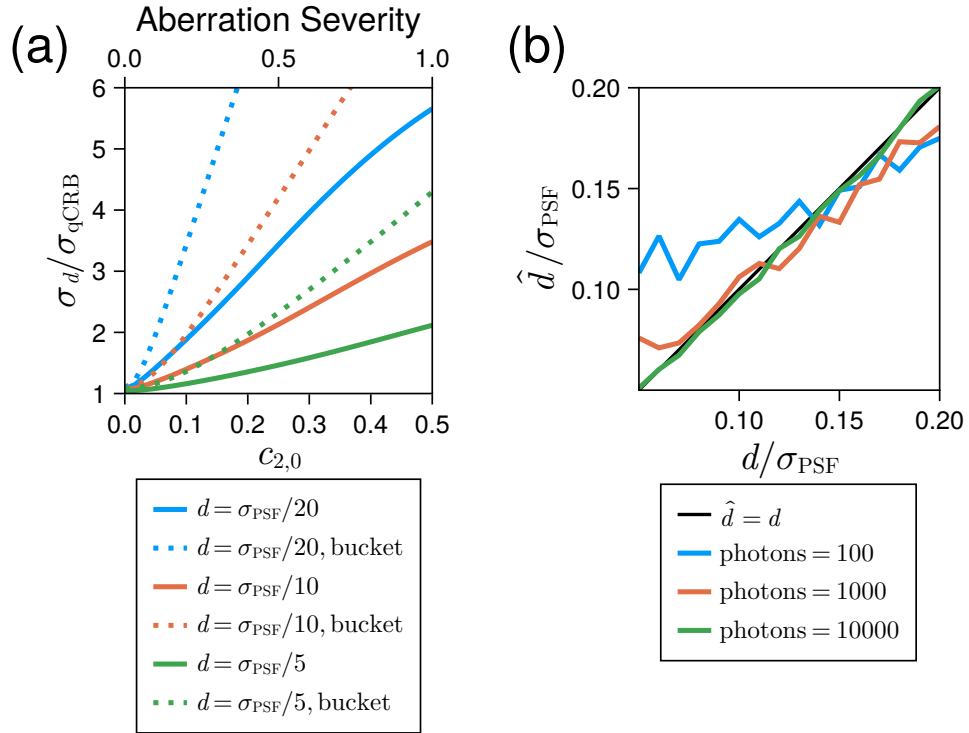

**Fig. S3. Intra-SLIVER phase defocus.** (a)  $\sigma_d / \sigma_{qCRB}$  as a function of increasing defocus ( $n=2, l=0$ ) in one arm of the interferometer for pixelated (solid lines) and bucket (dashed lines) SLIVER measurements. (b) MLE of the separation for a Zernike coefficient of 0.25 at varying signal levels when the model has complete knowledge of the aberration.

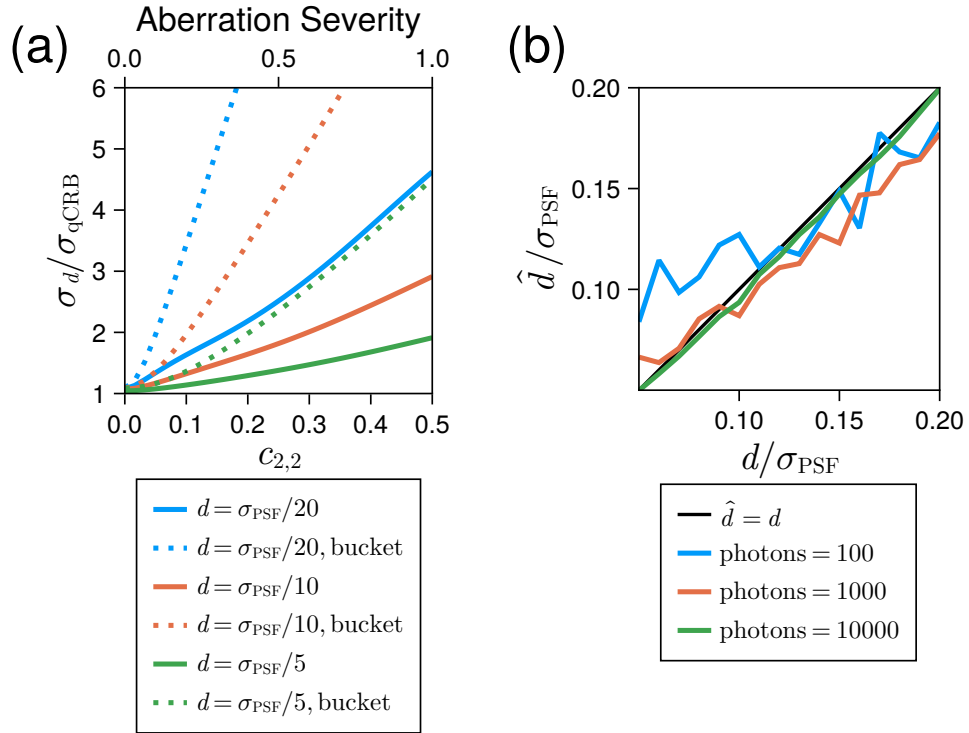

**Fig. S4. Intra-SLIVER phase astigmatism.** (a)  $\sigma_d / \sigma_{\text{qCRB}}$  as a function of increasing vertical astigmatism ( $n=2, l=2$ ) in one arm of the interferometer for pixelated (solid lines) and bucket (dashed lines) SLIVER measurements. (b) MLE of the separation for a Zernike coefficient of 0.25 at varying signal levels when the model has complete knowledge of the aberration.

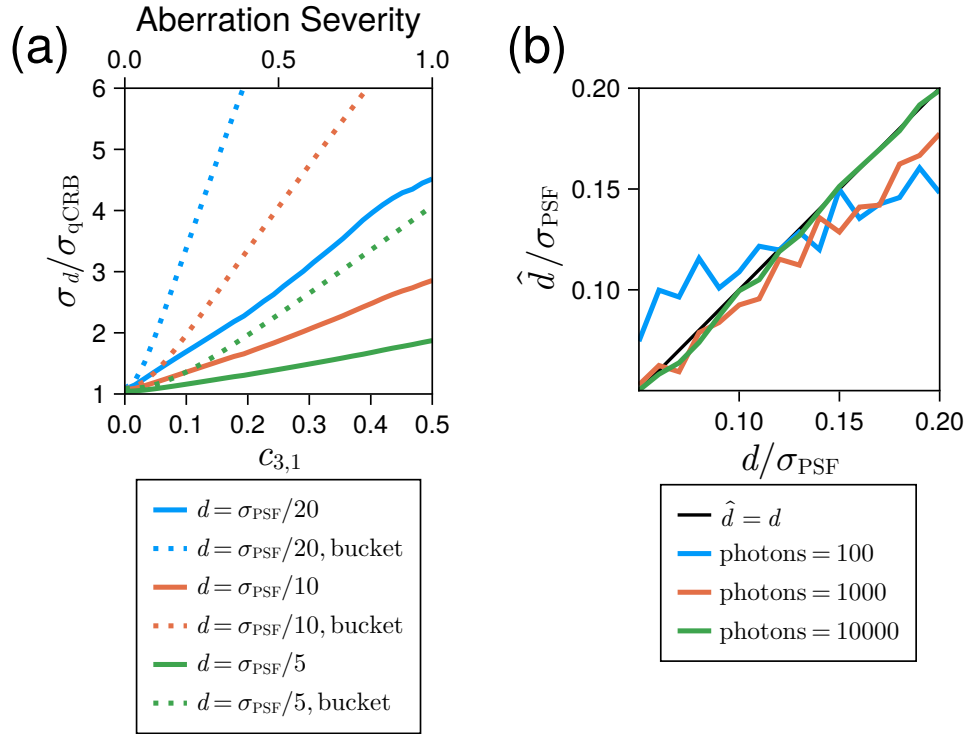

**Fig. S5. Intra-SLIVER phase coma.** (a)  $\sigma_d / \sigma_{q\text{CRB}}$  as a function of increasing horizontal coma ( $n=3, l=1$ ) (i.e., coma along the axis of separation) in one arm of the interferometer for pixelated (solid lines) and bucket (dashed lines) SLIVER measurements. (b) MLE of the separation for a Zernike coefficient of 0.25 at varying signal levels when the model has complete knowledge of the aberration.

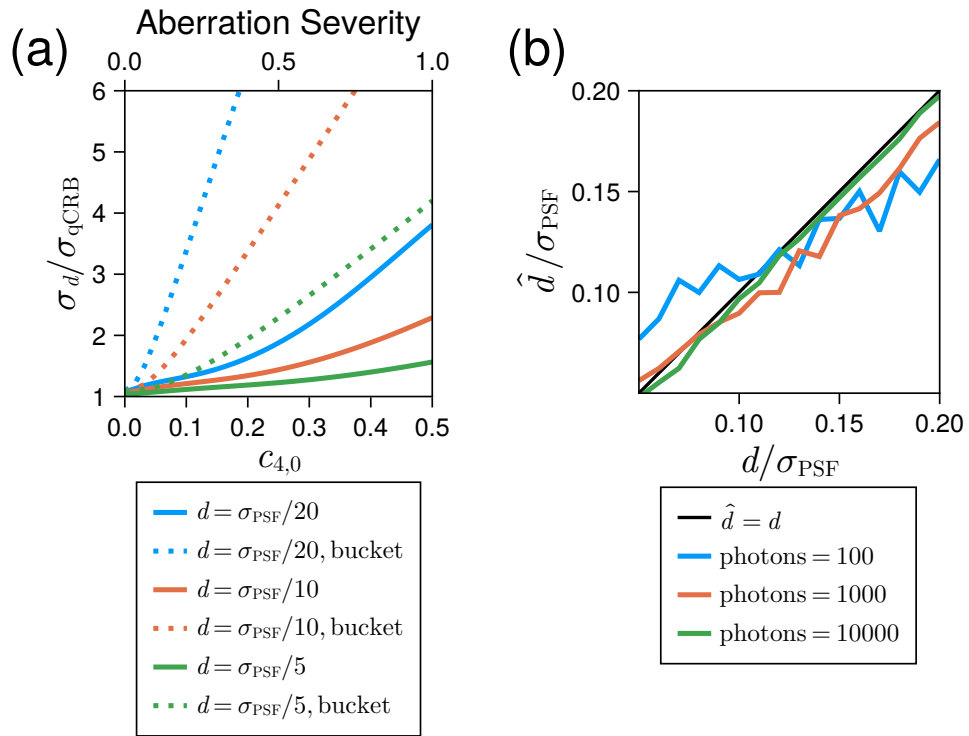

**Fig. S6. Intra-SLIVER spherical aberration.** (a)  $\sigma_d / \sigma_{\text{qCRB}}$  as a function of increasing spherical aberration ( $n=4, l=0$ ) in one arm of the interferometer for pixelated (solid lines) and bucket (dashed lines) SLIVER measurements. (b) MLE of the separation for a Zernike coefficient of 0.25 at varying signal levels when the model has complete knowledge of the aberration.

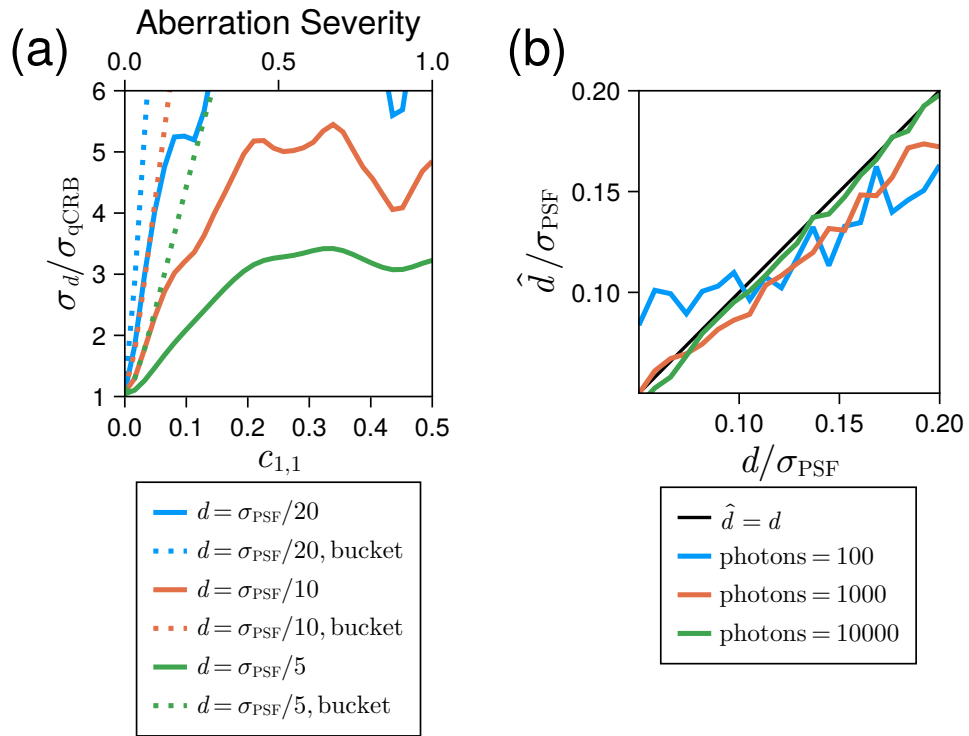

**Fig. S7. Extra-SLIVER phase tilt.** (a)  $\sigma_d / \sigma_{\text{qCRB}}$  as a function of increasing horizontal tilt ( $n=1$ ,  $l=1$ ) at the interferometer entrance for pixelated (solid lines) and bucket (dashed lines) SLIVER measurements. (b) MLE of the separation for a Zernike coefficient of 0.25 at varying signal levels when the model has complete knowledge of the aberration.



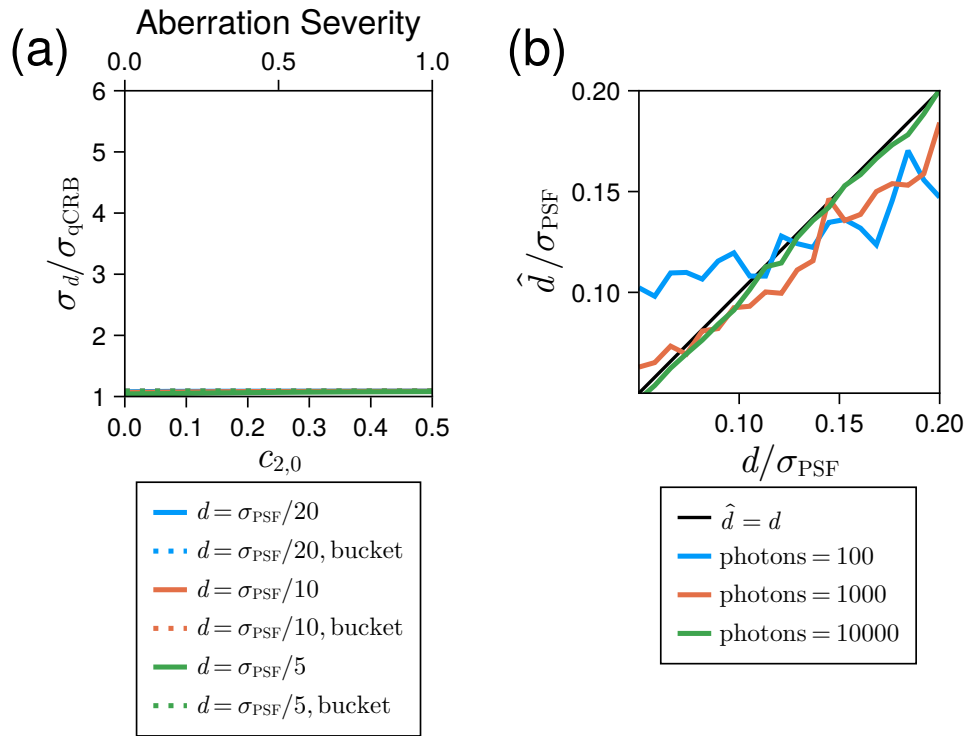

**Fig. S8. Extra-SLIVER phase defocus.** (a)  $\sigma_d / \sigma_{qCRB}$  as a function of increasing defocus ( $n=2, l=0$ ) at the interferometer entrance for pixelated (solid lines) and bucket (dashed lines) SLIVER measurements. (b) MLE of the separation for a Zernike coefficient of 0.25 at varying signal levels when the model has complete knowledge of the aberration.

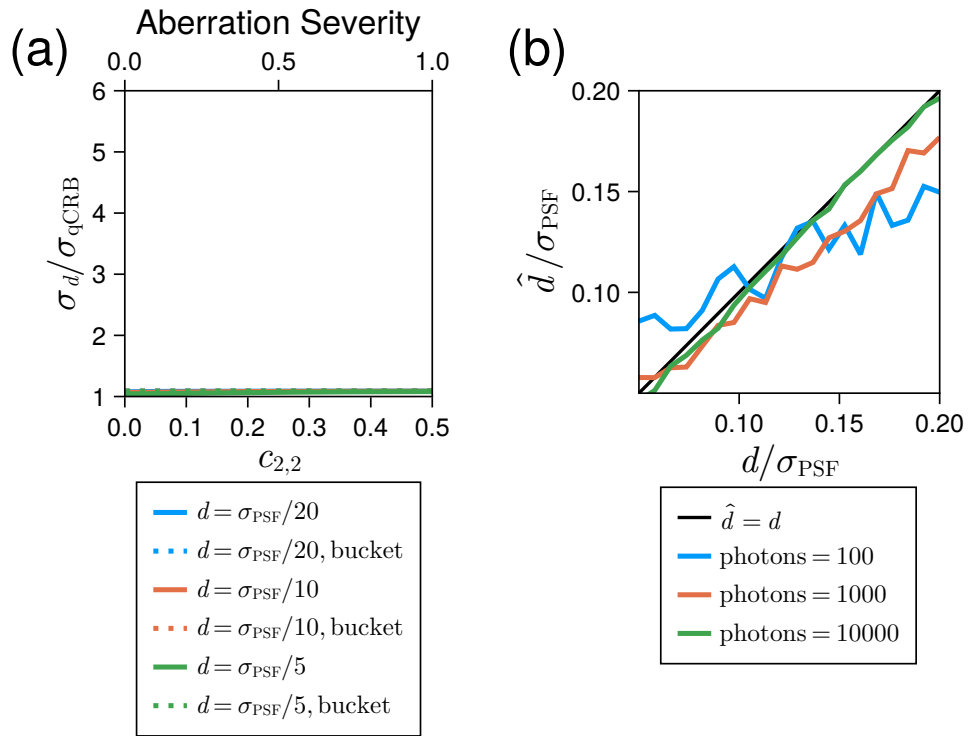

**Fig. S9. Extra-SLIVER phase astigmatism.** (a)  $\sigma_d/\sigma_{\text{qCRB}}$  as a function of increasing vertical astigmatism ( $n=2, l=2$ ) at the interferometer entrance for pixelated (solid lines) and bucket (dashed lines) SLIVER measurements. (b) MLE of the separation for a Zernike coefficient of 0.25 at varying signal levels when the model has complete knowledge of the aberration.

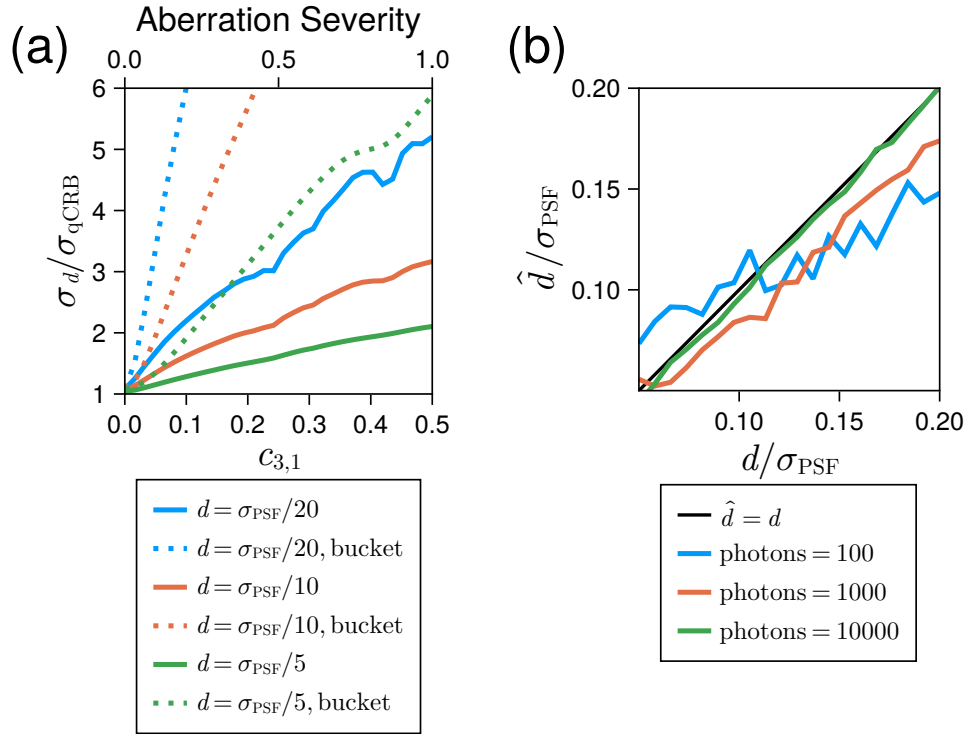

**Fig. S10. Extra-SLIVER phase coma.** (a)  $\sigma_d / \sigma_{q\text{CRB}}$  as a function of increasing horizontal coma ( $n=3, l=1$ ) (i.e., coma along the axis of separation) at the interferometer entrance for pixelated (solid lines) and bucket (dashed lines) SLIVER measurements. (b) MLE of the separation for a Zernike coefficient of 0.25 at varying signal levels when the model has complete knowledge of the aberration.

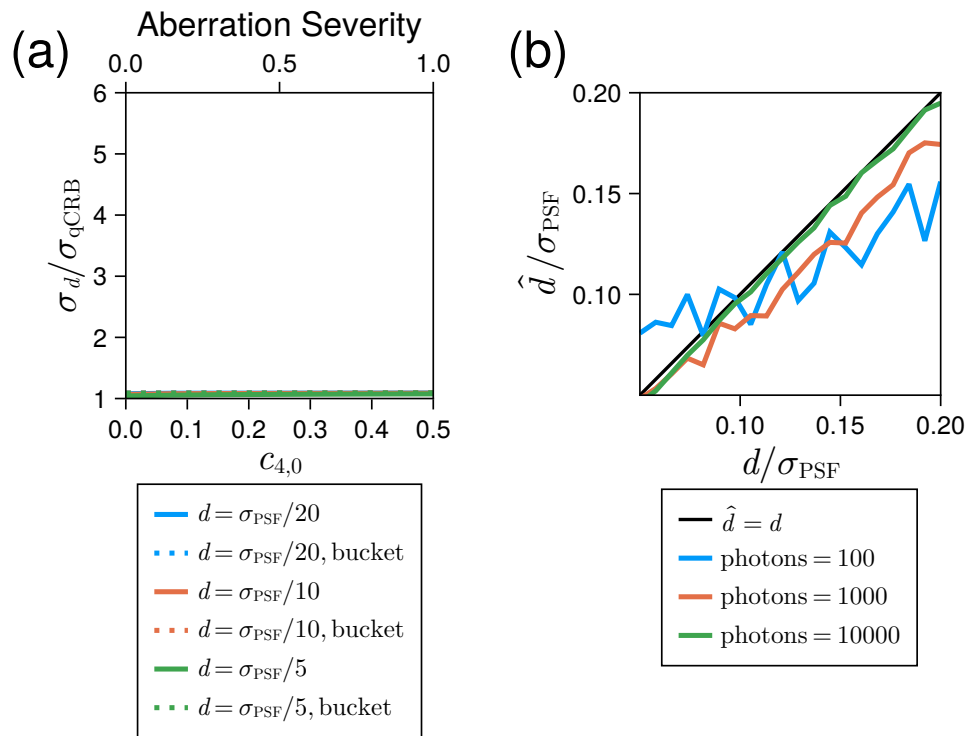

**Fig. S11. Extra-SLIVER spherical phase aberration.** (a)  $\sigma_d / \sigma_{q\text{CRB}}$  as a function of increasing spherical aberration ( $n=4, l=0$ ) at the interferometer entrance for pixelated (solid lines) and bucket (dashed lines) SLIVER measurements. (b) MLE of the separation for a Zernike coefficient of 0.25 at varying signal levels when the model has complete knowledge of the aberration.

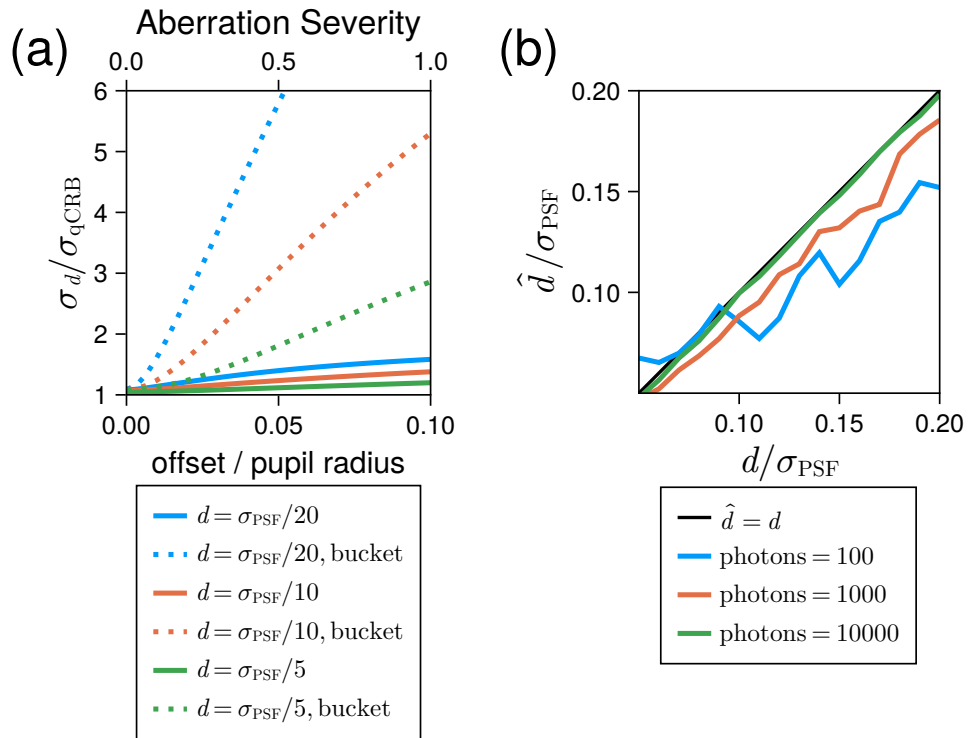

**Fig. S12. Interferometer arm misalignment.** (a)  $\sigma_d / \sigma_{qCRB}$  as a function of increasing interferometer arm misalignment for pixelated (solid lines) and bucket (dashed lines) SLIVER measurements. (b) MLE of the separation for a pupil offset of 0.05 times the pupil radius at varying signal levels when the model incorporates knowledge of the pupil offset.

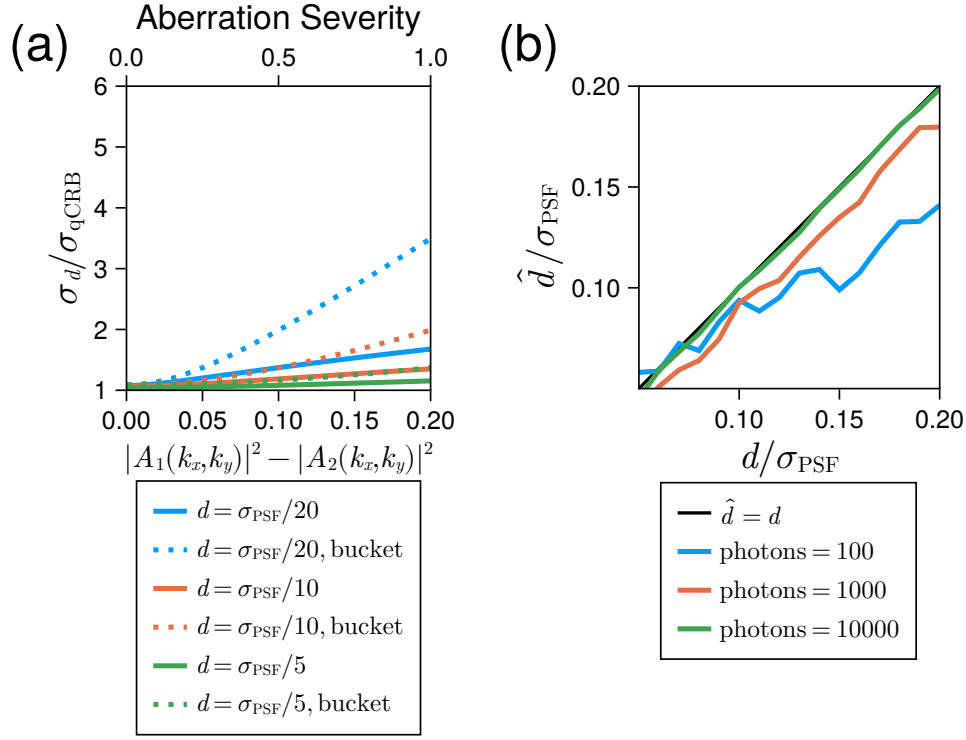

**Fig. S13. Interferometer arm energy asymmetry.** (a)  $\sigma_d/\sigma_{qCRB}$  as a function of increasing energy asymmetry between the interferometer arms for pixelated (solid lines) and bucket (dashed lines) SLIVER measurements. (b) MLE of the separation for an energy asymmetry  $|A_2(k_x, k_y)|^2 - |A_1(k_x, k_y)|^2$  of 0.1 when the model incorporates knowledge of the asymmetry.

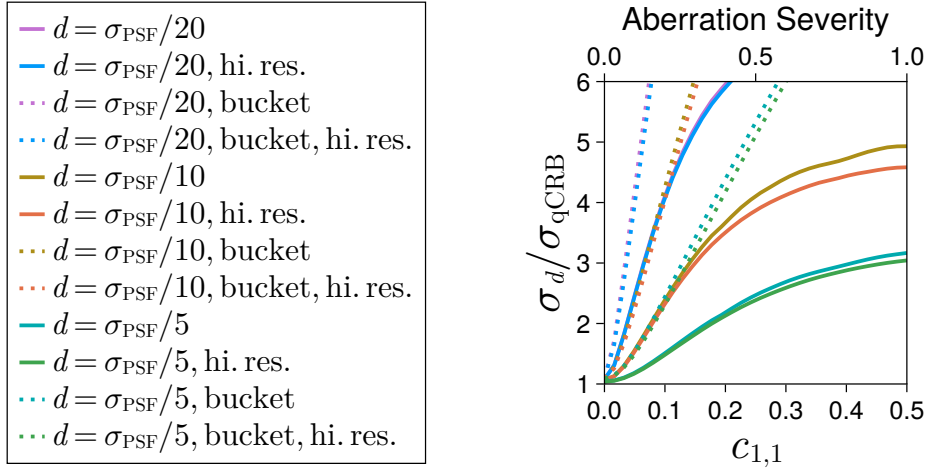

**Fig. S14. Pixel size comparison.**  $\sigma_d/\sigma_{qCRB}$  as a function of increasing horizontal tilt ( $n=1, l=1$ ) in one arm of the interferometer for pixelated (solid lines) and bucket (dashed lines) SLIVER measurements and at differing pixel sizes. The lines indicated by "hi. res." were computed with a pixel size  $\delta x' = \delta x/4$  where  $\delta x$  is the pixel size used to produce all other results shown in the manuscript.
